# Supplementary material
Source: publisher site journal article supplement (https://www.dovepress.com/article/597432)
Supplement: Supplementary file 1 [file 597432_Appendix%20Diagnosis%20classification.docx]

**Appendix: Diagnosis classification**

**Optic nerve**

**Vision**

**Lid**

**Pupil**

**Ocular Movements**

**Tumor**

**Elevated Intracranial hypertension**

**Vascular**

**VF defect=visual field defect**

**Imaging**

**Pain**

**Migraine and equivalents**

**Bone/skull disorder**

**Hydrocephalus**

**Trauma**

**Non organic**

**Not Neuro-Ophthalmology**

**Facial**

**Oto-neuro**

**Retina**

**Orbital**

**Genetic/CNS malformations**

**Treatment side effect**

**Normal**

**Optic Nerve=**

AION-anterior ischemic neuropathy

AAION- arteritic AION

NAION- non arteritic AION

PION- posterior Ischemic optic neuropathy

Optic neuropathy

TON-traumatic optic neuropathy

RON- radiation optic neuropathy

Optic atrophy

Optic/disc

Cupping

Coloboma

Drusen

ONHD-optic nerve head Drusen

Disc anomaly

Tilted disc

Neuritis

Papillitis

Swollen disc

Papilledema

Pseudo-papilledema

ONSF – optic nerve sheath fenestration

ION

Neuroretinitis

Peripapillary

peripapillary hemorrhage

**Vision**

Blur

Loss

Amaurosis fugax

Metamorphopsia

Micropsia

Photophobia

Visual complains

Amblyopia

Photopsias

Visual acuity unexplained

Visual disturbances

Hallucinations

Accommodative spasm

TVO

Charles bonnet syndrome

glare

Light sensitivity

polyopia

Flashes

**Lid**

Ptosis

Retraction

Blepharospasm

Blinking

Twitch

Myokymia

Dermatochalasis

**Pupil**

Anisocorea

Adie's

Horner

Miosis

Mydriasis

Parinaud

Pupillary response sluggish

Harelquin

**Ocular movements**

Limitation

Diplopia

EOM abnormality

Skew

Esotropia/esophoria

Exotropia/exophoria

Palsy III/IV/VI

Nystagmus

Convergence insufficiency

INO

One and a half

Myokymia superior oblique

Opsoclonus

PSP

Ocular flutter

Sunset

Hypertropia

strabismus

myoclonus

VOR

Duane

Exophoria

Gaze issues

Abnormal head position at near sight

Head tilt

Fixation instability

Oscillopsia

**Tumor**

Meningioma: optic nerve sheath, clinoid, skull base, cavernous,tuberculum,sellar,olfactory

Glioma: optic nerve, low grade (LGG),

Acoustic neurinoma

Ependymoma

Chordoma

PENT

Metastasis

GBM

Astrocytoma

Craniopharyngioma

Pituitary adenoma

Madulloblastoma

Lymphoma

Leukemia

Multiple myeloma

Neurofibroma

VHL von hippel landau

CLL

Polycithemia vera

cholestatoma

JPA

Pineal cyst

Choroidal cyst

Carcinoma

Hypothalamic lymphoid hyperplasia

quadrigeminal plate cyst

Choroidal plexus papilloma

Epidermoid

ALL

Arachnoid cyst

Granuloma CPA

**Elevated Intracranial hypertension**

Hydrocephalus

Pseudotumor cerebri (PTC)

Post intacranial hypertension

Idiopathic intracranial hypertension (IIH)

Hydrocephalus

Ventriculo-peritoneal shunt (VP shunt)

ICP

**Vascular (CNS)**

Arteriovenous malformation (AVM)

Dural AVM (DAVM)

Sinus vein thrombosis (SVT)

Cavernous hemangioma

Cavernoma

Aneurysm

Dolichoectasia

Dissection

Carotid stenosis

intracranial hemorrhage

subarachnoid hemorrhage

Stroke

TIA – transient ischemic artery

Jugular stenosis

Multiinfarcts vs press-

Ischemic

**Neurological/systemic conditions**

Multiple sclerosis (MS)

Neuromyelitis optica (NMO)

Anti MOG

Demyelinating

Parkinson

Myasthenia

Hyperprolactinemia

polychondritis

Ataxia

Post congenital CMV encephalitis

xdermatomyositis

serositis

VL periventricular leukomalacia

sarcoidosis

dementia

Pachymeningitis

Meningitis

Autism

Developmental delay

White matter changes

Thrombophilia

FTY 720

epilepsy

ADEM

Tolosa-Hunt

Vitamin deficiency

ADHD

HBV

ANCA

Frontal lesion

Thalamic lesion

Cerebellar lesion

CNS syphilis

Convulsion

paresthesia

Marie charoat syndrome

Cerebellar lesion

Leukoencephalitis

meningioencephalitis

**VF defect=visual field defect**

Constriction

Homonymous

Hemianopia

Quadrianopia

Junctional scotoma

Bitemporal

Chiasmal

Tract

Enlarged blind spot

Cortical blindness

Scotoma paracentral

Junctional scotoma

**Imaging (enlarged or thinning or enhancing or abnormal)**

CT

MRI

OCT

US

VEP

Imaging

ERG

**Pain**

Headache

Asthenopia

Dysesthesia

Hypoesthesia

Trigeminal abnormality

Eye discomfort

Eye tired

Eye ache

Asthenopia

**Migraine and equivalents**

Migraine

Migraine equivalent

Migraine with aura

Aura

Scintillaiting scotoma

HaNDL syndrome

**Bone/skull disorder**

Fibrous dysplasia

Craniosynostosis

Osteoporosis

**Trauma**

Dural hematoma

Subdural hematoma

fructure

**Non organic**

functional

**Risk Factor**

Para infectious

Nausea

Renal

PAF – Paroxismal atrial fibrillation

Hyperglycemia – glucose intolerance

Hyperlipidemia

DM

GOUT

Sleep apnea

cardiomyopathy

hashimoto thyroiditis

fever

CRF

General weakness

COPD

Crohn’s

celiac disease

GH deficiency

Atrial flutter

Atrial fibrillation

hypothyroidism

hyperemesis

Polymyalgia rheumatica

Rheumatic disease

fibromyalgia

Failure to thrive

hemodyalasis

anemia

Cushing

PCO

Dyslipidemia

IHD

Obesity

HIV

SLE

APLA- thrombophillia

**Facial**

Hemifacial spasm

Facial nerve palsy

Palsy VII

Eight and a half syndrome

Sensory complains

epiphora

**Oto-neuro**

Vertigo

Dizziness

Tinnitus

**Retina**

Macular hole/pseudohole

Central retinal vein occlusion (CRVO)

Branch retinal artery occlusion (BRAO)

ERM

Vitreitis

Episcleral vessels congestion

Retinal pigmentary lesion

Retinal vasculitis

Retinal dystrophy

Retinal sheeting of blood vessels

cohoroideremia-macular schisis

retinal blood vessels tortuosity

Maculopathy

AMD

CRAO – central retinal artery occlusion
MEWDS - Multiple Evanescent White Dot Syndrome

Diabetic retinopathy

Floater

PVD

CSR – central serous retinopathy

Vitreal haze/floater

MAR – melanoma associated retinopathy

Radiation retinopathy

MACEL retinopathy

**Orbital**

Proptosis

Space occupying lesion (SOL)

Enophthalmos

exopthalmos

hypoglobus

**Genetic/CNS malformations**

Septo-optic dysplasia

Corpus calosum agenesis

OPA 1

NF 1

leukodystrophy

FMF familial medeteranian fever

DOA

3MGA

STURGE WEBER

CPEO

DYSCHROMATOSIS SYMETRICA HEREDITARIA

POLG-A

BMMRD – biallelic mismatch repair deficiency

Chiari malformation

**Treatment or side effect**

Radiotherapy

Chemotherapy

PFO

Biological therapy

APL – ATRA treatment

Prosthesis movement limitation

Cervical epidural abscess surgery

Mitral valve repair

Plaquenil

ANTI MEK treatment

Post RT

**EYE**

Uveitis

Cataract

Ocular hypertension-OHT

Glaucoma

OHT

IOP- intraocular pressure

Myopia

Hyperopia

Astigmatism

anisometropia

Conjunctival irritation

Nevus

Enlarged episcleral vessels

Phthisis

Dyschromatopsia

Refraction

Pseudophakaia

NTG

Presbyopia

Keratoconus

**Surface**

Dry eye

Superficial epithelial keratitis (SPK)

Punctate keratitis

corneal

Herpas zoster

Hyperesthesia

Bullos kerotapathy

**Normal**

Pseudo-neuro

Normal NO exam

Physiologic

no findings- negative apraclonidin test

No neuro findings

**Not significant=No diagnosis**

Schisoidic disorder

Pregnancy

Preterm

pacemaker

Bipolar

Depression

anxiety

Hyrsutism

OCD

No symptoms

Asymptomatic

Monoclus

**Definition of Analytic Diagnostic Categories**

| Analytic category | Included diagnoses (examples) |
| --- | --- |
| Optic nerve disorders | AION, AAION, NAION, PION, optic neuritis, neuroretinitis, papillitis, papilledema, pseudopapilledema, optic atrophy, optic disc anomalies, ONHD, traumatic optic neuropathy, radiation optic neuropathy, peripapillary hemorrhage |
| Ocular motility disorders | Diplopia, cranial nerve III/IV/VI palsies, strabismus (eso/exo/hyper), INO, nystagmus, gaze palsy, skew deviation, convergence insufficiency, ocular flutter, opsoclonus, superior oblique myokymia |
| IIH / PTC | Idiopathic intracranial hypertension, pseudotumor cerebri |
| Tumor / compressive lesions | Optic nerve sheath meningioma, optic pathway glioma, pituitary adenoma, sellar and parasellar tumors, intracranial tumors with compressive neuro-ophthalmic manifestations |
| Visual function complaints | Blurred vision, unexplained visual loss, photophobia, visual disturbances without structural or motility findings |
